# Supplementary material
Source: publisher site journal article supplement (https://www.degruyterbrill.com/publication/isbn/9783110258615/downloadAsset/9783110258615_Contents.pdf)
Supplement: Supplementary file 1 [file 9783110258615_Contents.pdf]

# Contents

Preface — vii

Notation — ix

**0 Introduction — 1**

**1 Preliminaries — 13**

- 1.1 Simple transformations and examples — 13
- 1.1.1 Dirac-type systems as a subclass of canonical systems — 13
- 1.1.2 Schrödinger systems as a subclass of canonical systems — 18
- 1.1.3 Gauge transformations of the Dirac systems — 19
- 1.2  $S$ -nodes and Weyl functions — 22
- 1.2.1 Elementary properties of  $S$ -nodes — 22
- 1.2.2 Continual factorization — 24
- 1.2.3 Canonical systems and representation of the  $S$ -nodes — 27
- 1.2.4 Asymptotics of the Weyl functions, a special case — 30
- 1.2.5 Factorization of the operators  $S$  — 36
- 1.2.6 Weyl functions of Dirac and Schrödinger systems — 38

**2 Self-adjoint Dirac system: rectangular matrix potentials — 44**

- 2.1 Square matrix potentials: spectral and Weyl theories — 45
- 2.1.1 Spectral and Weyl functions: direct problem — 45
- 2.1.2 Spectral and Weyl functions: inverse problem — 48
- 2.2 Weyl theory for Dirac system with a rectangular matrix potential — 49
- 2.2.1 Direct problem — 49
- 2.2.2 Direct and inverse problems: explicit solutions — 56
- 2.3 Recovery of the Dirac system: general case — 61
- 2.3.1 Representation of the fundamental solution — 62
- 2.3.2 Weyl function: high energy asymptotics — 66
- 2.3.3 Inverse problem and Borg–Marchenko-type uniqueness theorem — 69
- 2.3.4 Weyl function and positivity of  $S$  — 73

**3 Skew-self-adjoint Dirac system: rectangular matrix potentials — 79**

- 3.1 Direct problem — 80
- 3.2 The inverse problem on a finite interval and semiaxis — 83
- 3.3 System with a locally bounded potential — 94

**4 Linear system auxiliary to the nonlinear optics equation — 101**

- 4.1 Direct and inverse problems — 102

|          |                                                                                               |            |
|----------|-----------------------------------------------------------------------------------------------|------------|
| 4.1.1    | Bounded potentials —                                                                          | 102        |
| 4.1.2    | Locally bounded potentials —                                                                  | 106        |
| 4.1.3    | Weyl functions —                                                                              | 115        |
| 4.1.4    | Some generalizations —                                                                        | 117        |
| 4.2      | Conditions on the potential and asymptotics of generalized Weyl (GW) functions —              | 118        |
| 4.2.1    | Preliminaries. Beals–Coifman asymptotics —                                                    | 118        |
| 4.2.2    | Inverse problem and Borg–Marchenko-type result —                                              | 120        |
| 4.3      | Direct and inverse problems: explicit solutions —                                             | 123        |
| <b>5</b> | <b>Discrete systems —</b>                                                                     | <b>126</b> |
| 5.1      | Discrete self-adjoint Dirac system —                                                          | 126        |
| 5.1.1    | Dirac system and Szegő recurrence —                                                           | 127        |
| 5.1.2    | Weyl theory: direct problems —                                                                | 130        |
| 5.1.3    | Weyl theory: inverse problems —                                                               | 138        |
| 5.2      | Discrete skew-self-adjoint Dirac system —                                                     | 142        |
| 5.3      | GBDT for the discrete skew-self-adjoint Dirac system —                                        | 156        |
| 5.3.1    | Main results —                                                                                | 157        |
| 5.3.2    | The fundamental solution —                                                                    | 160        |
| 5.3.3    | Weyl functions: direct and inverse problems —                                                 | 164        |
| 5.3.4    | Isotropic Heisenberg magnet —                                                                 | 171        |
| <b>6</b> | <b>Integrable nonlinear equations —</b>                                                       | <b>177</b> |
| 6.1      | Compatibility condition and factorization formula —                                           | 178        |
| 6.1.1    | Main results —                                                                                | 178        |
| 6.1.2    | Proof of Theorem 6.1 —                                                                        | 179        |
| 6.1.3    | Application to the matrix “focusing” modified Korteweg-de Vries (mKdV) —                      | 181        |
| 6.1.4    | Second harmonic generation: Goursat problem —                                                 | 185        |
| 6.2      | Sine-Gordon theory in a semistrip —                                                           | 188        |
| 6.2.1    | Complex sine-Gordon equation: evolution of the Weyl function and uniqueness of the solution — | 189        |
| 6.2.2    | Sine-Gordon equation in a semistrip —                                                         | 193        |
| 6.2.3    | Unbounded solutions in the quarter-plane —                                                    | 207        |
| <b>7</b> | <b>General GBDT theorems and explicit solutions of nonlinear equations —</b>                  | <b>210</b> |
| 7.1      | Explicit solutions of the nonlinear optics equation —                                         | 210        |
| 7.2      | GBDT for linear system depending rationally on $z$ —                                          | 212        |
| 7.3      | Explicit solutions of nonlinear equations —                                                   | 221        |

|                         |                                                                                                              |
|-------------------------|--------------------------------------------------------------------------------------------------------------|
| <b>8</b>                | <b>Some further results on inverse problems and generalized Bäcklund-Darboux transformation (GBDT) — 230</b> |
| 8.1                     | Inverse problems and the evolution of the Weyl functions — 230                                               |
| 8.2                     | GBDT for one and several variables — 234                                                                     |
| <b>9</b>                | <b>Sliding inverse problems for radial Dirac and Schrödinger equations — 242</b>                             |
| 9.1                     | Inverse and half-inverse sliding problems — 242                                                              |
| 9.1.1                   | Main definitions and results — 242                                                                           |
| 9.1.2                   | Radial Schrödinger equation and quantum defect — 248                                                         |
| 9.1.3                   | Dirac equation and quantum defect — 252                                                                      |
| 9.1.4                   | Proofs of Theorems 9.10 and 9.14 — 256                                                                       |
| 9.1.5                   | Dirac system on a finite interval — 257                                                                      |
| 9.2                     | Schrödinger and Dirac equations with Coulomb-type potentials — 259                                           |
| 9.2.1                   | Asymptotics of the solutions: Schrödinger equation — 260                                                     |
| 9.2.2                   | Asymptotics of the solutions: Dirac system — 261                                                             |
| <b>Appendices — 265</b> |                                                                                                              |
| <b>A</b>                | <b>General-type canonical system: pseudospectral and Weyl functions — 267</b>                                |
| A.1                     | Spectral and pseudospectral functions — 268                                                                  |
| A.1.1                   | Basic notions and results — 268                                                                              |
| A.1.2                   | Description of the pseudospectral functions — 272                                                            |
| A.1.3                   | Potapov's inequalities and pseudospectral functions — 283                                                    |
| A.1.4                   | Description of the spectral functions — 290                                                                  |
| A.2                     | Special cases — 297                                                                                          |
| A.2.1                   | Positivity-type condition — 297                                                                              |
| A.2.2                   | Continuous analogs of orthogonal polynomials — 301                                                           |
| <b>B</b>                | <b>Mathematical system theory — 304</b>                                                                      |
| <b>C</b>                | <b>Krein's system — 306</b>                                                                                  |
| <b>D</b>                | <b>Operator identities corresponding to inverse problems — 308</b>                                           |
| D.1                     | Operator identity: the case of self-adjoint Dirac system — 309                                               |
| D.2                     | Operator identity for skew-self-adjoint Dirac system — 312                                                   |
| D.3                     | Families of positive operators — 313                                                                         |
| D.4                     | Semiseparable operators $S$ — 314                                                                            |
| D.5                     | Operators with $D$ -difference kernels — 317                                                                 |
| <b>E</b>                | <b>Some basic theorems — 320</b>                                                                             |
| Bibliography — 323      |                                                                                                              |
| Index — 339             |                                                                                                              |
